# **Linking Population Dynamics to Microbial Kinetics for Hybrid Modeling of Engineered Bioprocesses**

Zhang Cheng <sup>a</sup>, Shiyun Yao <sup>a</sup>, Heyang Yuan <sup>a,\*</sup>.

<sup>a</sup> Department of Civil & Environmental Engineering, Temple University, 1947 N. 12th Street, Philadelphia, PA 19122, USA

Type of contribution: *Research Article*

\* **Corresponding author**

heyang.yuan@temple.edu;

## 1 **Abstract**

2 Mechanistic and data-driven models have been developed to provide predictive insights into the  
3 design and optimization of engineered bioprocesses. These two modeling strategies can be  
4 combined to form hybrid models to address the issues of parameter identifiability and prediction  
5 interpretability. Herein, we developed a novel and robust hybrid modeling strategy by  
6 incorporating microbial population dynamics into model construction. The hybrid model was  
7 constructed using bioelectrochemical systems (BES) as a platform system. We collected 77  
8 samples from 13 publications, in which the BES were operated under diverse conditions, and  
9 performed holistic processing of the 16S rRNA amplicon sequencing data. Community analysis  
10 revealed core populations composed of putative electroactive taxa *Geobacter*, *Desulfovibrio*,  
11 *Pseudomonas*, and *Acinetobacter*. Primary Bayesian networks were trained with the core  
12 populations and environmental parameters, and directed Bayesian networks were trained by  
13 defining the operating parameters to improve the prediction interpretability. Both networks were  
14 validated with Bray-Curtis similarity, relative root-mean-square error (RMSE), and a null model.  
15 The hybrid model was developed by first building a three-population mechanistic component and  
16 subsequently feeding the estimated microbial kinetic parameters into network training. The hybrid  
17 model generated a simulated community that shared a Bray-Curtis similarity of 72% with the  
18 actual microbial community and an average relative RMSE of 7% for individual taxa. When  
19 examined with additional samples that were not included in network training, the hybrid model  
20 achieved accurate prediction of current production with a relative error-based RMSE of 0.8 and  
21 outperformed the data-driven models. The genomics-enabled hybrid modeling strategy represents  
22 a significant step toward robust simulation of a variety of engineered bioprocesses.

23

- 24 **Keywords:** Engineered bioprocess, Microbial population dynamics; Microbial kinetics; Machine  
25 learning, Bayesian network; Hybrid modeling.

## 26 **1. Introduction**

27 Engineered bioprocesses are widely applied to treat waste streams and recover valuable resources  
28 (Rittmann and McCarty 2012). To facilitate the design and optimization of full-scale bioprocesses,  
29 a number of mechanistic and data-driven models have been developed over the past 60 years  
30 (Batstone et al. 2002, Bhat and McAvoy 1990, Henze et al. 2000).

31  
32 Mechanistic models can provide predictive insights into the fundamental processes in biological  
33 systems (Jeppsson 1996). The model structure has been improved with a greater understanding of  
34 the microbiomes in biological systems (Donoso-Bravo et al. 2011, Henze et al. 2000, Ng and Kim  
35 2007). For example, the Anaerobic Digestion Model No.1 composed of 19 bioconversion steps  
36 and 100 parameters is by far the most comprehensive mechanistic model formulated for engineered  
37 bioprocesses and can be readily modified to simulate specific applications (Liu et al. 2017,  
38 Rodríguez et al. 2008, Zhao et al. 2019). An inherent problem of this modeling strategy is that the  
39 model structure and parameters are largely unidentifiable (Donoso-Bravo et al. 2011, Jeppsson  
40 1996). This stems from the simulation of microbial kinetics, in which the functional populations  
41 cannot be fully recapitulated by the Monod expressions, and the associated kinetic parameters  
42 cannot be directly measured (Donoso-Bravo et al. 2011, Ng and Kim 2007). Although kinetic  
43 parameters can be derived from biochemical measurements, they show considerable variations  
44 under different operating conditions (Bernard et al. 2006, Ng and Kim 2007). As a result, a  
45 mechanistic model developed for a specific bioprocess needs constant parameter calibration to  
46 cope with operational perturbations but still falls short when applied to other biological systems.

47

48 Data-driven models are not limited by identifiability issues and can yield more accurate predictions  
49 than mechanistic models do when a sufficiently large data pool is provided (Walpole et al. 2017).  
50 Artificial neural networks can be constructed with appropriate input variables and network  
51 architecture to predict the effluent quality (Mendes et al. 2015, Moral et al. 2008). Recent studies  
52 have demonstrated the applicability of several machine learning algorithms, including support  
53 vector machine, random forest, extreme gradient boosting, and k-nearest neighbors, to full-scale  
54 anaerobic digesters (De Clercq et al. 2019, Wang et al. 2020b). Despite the outstanding learning  
55 performance, most of the data-driven models are black boxes that are unable to generate  
56 interpretable predictions (Rudin 2019). This is particularly problematic for complex biological  
57 systems whose performance is largely determined by the microbial population and activity, and  
58 thus no mechanistic insights can be obtained from the simulation. Training data-driven models  
59 with microbial population dynamics presents a promising solution to tackle this issue. Previous  
60 studies have incorporated genomic data into machine learning models (neural networks and  
61 Bayesian networks) to reconstruct microbial communities in natural ecosystems (Kuang et al. 2016,  
62 Larsen et al. 2012). Using similar strategies, an array of data-driven models was constructed to  
63 simulate the performance and stability of engineered bioprocesses (Lesnik et al. 2020, Lesnik and  
64 Liu 2017, Yuan et al. 2017).

65  
66 Hybrid models can potentially address the limitations of those two modeling strategies (Cote et al.  
67 1995, Karama et al. 2001, Zhao et al. 1997). A common approach is to couple the mechanistic and  
68 statistical components in series. The error signals obtained from the mechanistic component are  
69 converted into those for the network component, which are subsequently used to update the  
70 network weights through back-propagation (Lee et al. 2002). Through such integration, hybrid

71 models yield robust and semi-interpretable predictions for non-linear behaviors such as microbial  
72 kinetics (Zendehboudi et al. 2018). By far, all hybrid models are built with physical and  
73 biochemical parameters and thus unable to reveal the connections between microbial population  
74 and microbial kinetics. We propose to link them and improve the prediction robustness by  
75 incorporating genomic data into model construction.

76  
77 The objectives of this study are to 1) comprehensively characterize the microbiome in a specific  
78 type of bioprocess and 2) formulate a novel hybrid model based on the population dynamics and  
79 microbial kinetics. To this end, we used bioelectrochemical systems (BES) as a platform system  
80 for model construction. As emerging biotechnology that simultaneously achieves  
81 water/wastewater treatment and energy/resource recovery (Logan et al. 2006, Wang and Ren 2013),  
82 BES are ideal for this task because they respond quickly to environmental perturbations (Yuan et  
83 al. 2016, Yuan et al. 2015), with current production acting as a sensitive indicator of the microbial  
84 population and functional dynamics. The microbial communities in BES are highly enriched with  
85 relatively low microbial diversity (Yates et al. 2012, Zhu et al. 2014), and hence represent a  
86 desirable level of complexity: diverse enough to be relevant to the microbiomes in other  
87 bioprocesses yet simple enough to be *in silico* reconstructed. To improve the compatibility of our  
88 models, we performed an extensive literature review and collected the 16S rRNA gene amplicon  
89 sequencing data from 77 samples in 13 publications, in which the BES were operated under a wide  
90 range of conditions. Core populations were selected at different taxonomic levels and used to train  
91 Bayesian networks, a machine learning model capable of characterizing the causal relationships  
92 among variables (Uusitalo 2007). Meanwhile, microbial kinetics were calculated using a three-  
93 population mechanistic component and fed into the training process to improve the prediction.

94 This hybrid modeling strategy is expected to take advantage of the rapid growth of the genomic  
95 database (Kahn 2011), circumvent the time-consuming calibration of the kinetic parameters, and  
96 be broadly applicable to a variety of engineered bioprocesses.

97

## 98 **2. Materials and Methods**

### 99 **2.1 Data collection and sequence processing**

100 A comprehensive literature review was carried out, and 13 publications containing 77 samples  
101 were selected for downstream community analysis and model construction. The detailed  
102 information about the selected publications is listed in the Supporting Information (SI) Table S1.  
103 The selection criteria are: 1) 16s rRNA gene amplicon sequences were properly deposited in the  
104 National Center for Biotechnology Information (NCBI) or DNA Data Bank of Japan (DDBJ)  
105 databases for holistic sequence processing; 2) the results reported eight key parameters closely  
106 related to BES performance, including substrate composition and concentration, coulombic  
107 efficiency (CE), pH, current, anode area, external resistance, hydraulic retention time, and  
108 temperature; 3) the results included the variation of chemical oxygen demand (COD) over time or  
109 currents/voltage that can be used to calculate the time series of COD. The selected studies show a  
110 variety of reactor configurations, operation modes, substrates, and operating conditions (SI Table  
111 S1), which is expected to enhance the compatibility of the predictive models developed in the  
112 present study.

113

114 The sequence data from the selected publications contained both pair-end or single-end reads and  
115 were converted into a uniform format before further processing. Briefly, pair-end reads were  
116 merged using Vsearch (Rognes et al. 2016), and the chimeric and low-quality sequences were

117 eliminated using the QIIME2 plug-in DADA2 (Callahan et al. 2016). The Greengenes database  
118 (gg\_13\_8 updated February 2011) was used to conduct sequence alignment and train the taxonomy  
119 classifier of the denoised sequences (DeSantis et al. 2006). In addition, due to the various primer-  
120 targeted regions (V1-V9) used to amplify 16s rRNA gene in those studies, the primer pair 8F/907R  
121 was set as the forward and reverse primers for the classifier to encompass all of the sequences from  
122 the samples.

123

## 124 **2.2 Community analysis**

125 Alpha (Shannon and Simpson indices) diversity analysis, principal coordinate analysis (PCoA),  
126 and redundancy analysis (RDA) were performed using R to unravel intra-sample diversity and  
127 inter-sample distance. Core populations were selected at the genus, order, and phylum levels with  
128 the following criteria (Yuan et al. 2019): 1) at least one occurrence in the 13 studies with the  
129 relative abundance  $\geq 0.05\%$  and 2) average relative abundance  $\geq 2\%$  across all 77 samples. The  
130 criteria allow us to retain the major functional populations in the microbial community and  
131 compress the genomic data for downstream model construction. For this reason, core population  
132 was not selected at the operational taxonomic unit (OTU) level as the 100%-similarity clustering  
133 strategy generated over 9,000 OTUs, and the majority of the samples have little overlap on the  
134 community composition. To build a phylogenetic tree for the core genera, the sequence of the most  
135 abundant OTU within a core genus was selected as a representative. The phylogenetic tree was  
136 built using ARB (Ludwig et al. 2004), and the *Silva* database (LTPs132\_SSU.arb for 16s rDNA  
137 updated June 2018) was used for sequence alignment (Quast et al. 2013).

138

## 139 **2.3 Bayesian network analysis**



140 To prepare for network construction, the abundance of the core taxa and the values of the  
141 environmental parameters were scaled to 0 – 1 (Bishop 2013):

$$142 \quad w_{n,i,j} = \frac{w_{i,j} - w_{j,min}}{w_{j,max} - w_{j,min}} \quad (\text{Eq. 1})$$

143 where  $w_{i,j}$  is the relative abundance of population  $j$  in sample  $i$ ,  $w_{j,max}$  is the maximum relative  
144 abundance of population  $j$ ,  $w_{j,min}$  is the minimum relative abundance of population  $j$ , and  $w_{n,i,j}$  is  
145 the normalized abundance of population  $j$  in sample  $i$ . Structure learning and parameter learning  
146 were performed using the hill-climbing algorithm and maximum likelihood estimation,  
147 respectively (Scutari 2010).

148

149 Primary networks (SI Figures S4A, S5A, and S6A) were trained without considering the *a priori*  
150 knowledge about the operating conditions, and the node directions were solely inferred by the  
151 network algorithm. Directed networks (SI Figures S4B, S5B, and S6B) were trained by defining  
152 temperature, anode electrode area, external resistance, and hydraulic retention time as the parent  
153 nodes. This was because those parameters remained unchanged throughout the operation and thus  
154 were not affected by other parameters. A blacklist function was applied to define the unidirectional  
155 relationships between those operating parameters and other variables. The same training  
156 procedures were conducted at the genus (38 core taxa), order (32 core taxa), and phylum (13 core  
157 taxa) levels. Considering the sample quantity and computational cost, a leave-one-out cross-  
158 validation strategy was selected for three validation methods (Bro et al. 2008): Bray-Curtis  
159 similarity between the predicted and observed microbial community, relative root-mean-square  
160 error (RMSE, Eq. 2), and null model analysis.

$$161 \quad \text{relative RMSE} = \frac{\sqrt{\frac{\sum_1^n (\hat{y}_i - y_i)^2}{n}}}{y_{max}} \quad (\text{Eq. 2})$$

162 where  $\hat{y}_i$  is the predicted value;  $y_i$  is the observed value;  $y_{max}$  is the maximum observed value;  
163 and  $n$  is the number of samples. Null models were constructed by setting the abundance of all core  
164 taxa to the average abundance across all samples (Gotelli 2002 ).

165

## 166 **2.4 Hybrid model construction**

167 A hybrid model was constructed at the genus level to bridge population dynamics and microbial  
168 kinetics following the procedures shown in SI Figure S1. Briefly, maximum substrate utilization  
169 rates, maximum growth rates, and mediator yield were calculated using the mechanistic  
170 component described below and included as the nodes for network training. Although these kinetic  
171 parameters are unmeasurable, the normalization step (Eq. 1) converts exact values into a general  
172 tendency of microbial activity that can be statistically connected to the actual relative abundance  
173 of the core population (Weissman et al. 2021), and thus the estimated kinetic parameters do not  
174 need to be validated.

175

176 The mechanistic component assumes two-step degradation (SI Figure S2) of the substrates by three  
177 populations (Pinto et al. 2011). At the first stage, complex organic matters such as polysaccharides,  
178 lipids, and proteins are decomposed by primary degraders to low-molecular intermediate products  
179 including acetic acid, propionic acid, ethanol, etc. At the second stage, electroactive and non-  
180 electroactive microbes convert the intermediates into electrical energy and methane, respectively.  
181 Take electroactive microbes as an example, the mass balance for the growth and activity are  
182 described using Eq. 3 and Eq. 4, respective:

$$183 \frac{dX_{ee}}{dt} = \mu_{ee} \frac{S_1}{K_{ee} + S_1} \frac{M_{ox}}{K_M + M_{ox}} X_{ee} - k_{dee} X_{ee} - D \frac{1 + \tanh(f_{ee}(X_{ee} + X_{ne} - X_{ee,max}))}{2} X_{ee} \text{ (Eq. 3)}$$

184 
$$\frac{dM_{ox}}{dt} = -Y_M \cdot k_{ee} \frac{S_1}{K_{ee} + S_1} \frac{M_{ox}}{K_M + M_{ox}} + \frac{\gamma \cdot I}{V_a \cdot F \cdot X_{ee} n_e} \text{ (Eq. 4)}$$

185 where  $X_{ee}$  and  $M_{ox}$  are the concentrations of electroactive microbes and mediator, respectively;  
186  $K_{ee}$  and  $K_M$  are the substrate half-saturation constant and mediator half-saturation constant,  
187 respectively;  $\mu_{ee}$  and  $k_{d,ee}$  are the growth and decay rates,  $X_{ee,max}$  is the maximum capacity of  
188 electroactive microbes in the anode;  $Y_M$  is the mediator yield;  $\gamma$  is the molecular mass of mediator;  
189  $I$  is the current production;  $V_a$  is the anode volume;  $F$  is the Faraday constant (A/d·mol); and  $n_e$  is  
190 the number of electrons transfer. The mass balance was modified based on the multiplicative  
191 Monod expressions from previous studies (Ping et al. 2014, Pinto et al. 2010). The detailed  
192 formulation of the mechanistic component and the parameters can be found in the SI Method and  
193 Table S2. Because the selected publications provided multiple types of data and operated the  
194 reactors under distinct conditions, the mechanistic component was slightly modified for individual  
195 reactors (SI Table S3), and Literature #27 (S27) was not considered for mechanistic modeling  
196 because a time series of COD was not available.

197  
198 The maximum substrate utilization rate and maximum growth rate are considered to be the most  
199 critical values for simulation of engineered bioprocesses (Rittmann and McCarty 2012), and  
200 mediator yield is a unique parameter for BES. Those kinetic parameters were estimated with  
201 specific limits according to previous studies while others parameters were retrieved from literature  
202 (Kato Marcus et al. 2007, Wilson and Kim 2016). To estimate the parameters, the total substrate  
203 concentration over time and the initial values of the kinetic parameters were collected, calculated,  
204 or estimated from the selected papers. Because biomass and mediator concentrations were not  
205 measurable and unavailable in the literature, some assumptions are made: 1) primary degraders  
206 have an initial concentration of 100 mg/L in all reactors, 2) electroactive and non-electroactive

207 microbe grow evenly on the anode surface at an average thickness of 60  $\mu\text{m}$  (Lee et al. 2009,  
208 Torres et al. 2008), 3) the maximum biofilm capacity in BES was assumed to be 600 mg/L (Ping  
209 et al. 2014), and 4) the electroactive microbe fraction is proportional to the CE. For microbial  
210 electrolysis cells whose CE was higher than 100% because of the applied voltage, the  
211 concentration of electroactive microbes was assumed to be 500 mg/L. Because the dimension of  
212 the anode electrode was not directly provided in some of the studies, the area was estimated based  
213 on the specific area and size of the electrode (Logan et al. 2007).

214

## 215 **2.5 Model prediction**

216 Six additional publications were collected to further demonstrate the robustness of the hybrid  
217 model (SI Table S7). In the first step, the operating parameters (i.e., temperature, anode electrode  
218 area, external resistance, and hydraulic retention time) and pH from those studies were input into  
219 the Bayesian networks to predict current and CE directly. In the second step, the kinetic parameters  
220 obtained from the Bayesian network were input into the mechanistic component to calculate the  
221 steady-state COD, which was then converted into current production based on the expression of  
222 CE (Logan et al. 2006). The predicted and observed values were compared using an RMSE based  
223 on relative errors (Walpole et al. 2017):

$$224 \text{ relative error based RMSE} = \sqrt{\frac{\sum_1^n \left(\frac{\hat{y}_i - y_i}{y_i}\right)^2}{n}} \text{ (Eq. 5)}$$

225

## 226 **3. Results and Discussion**

### 227 **3.1 BES operated under a variety of conditions**

228 The 13 selected studies contained 39 samples from microbial fuel cells, 31 samples from microbial  
229 electrolysis cells with external voltage input, and 7 samples from microbial desalination cells with  
230 saline environments (SI Table S1). In addition to different reactor configurations, the bioreactors  
231 were fed with a variety of substrates whose main organic matter could be categorized as non-  
232 fermentable (acetate and methanol), fermentable (glucose, ethanol, and propyl alcohol), or  
233 complex (brewery wastewater, food waste, and pig slurry). The selected studies also presented  
234 multiple operation modes including batch, continuous, and continuous with pulse substrate loading.  
235 In terms of the performance, the 77 samples showed significant difference (SI Table S4) in CE  
236 which ranged from 0.02% (due to high external resistance, e.g., S22) to 140% (due to applied  
237 voltage, e.g., S37). Overall, the selected samples have included the conditions commonly found in  
238 BES studies and are expected to yield representative core populations and models.

239

### 240 **3.2 Core population in BES**

241 The 2.6 million sequence reads from the 77 samples resulted in approximately 9600 OTUs, based  
242 on which the alpha diversity was analyzed. Although the diversity indices (Shannon, Simpson, and  
243 Chao1, SI Table S5) did not follow a normal distribution as revealed by the Shapiro-Wilk analysis  
244 results ( $p < 0.05$ ), it could well reflect the variation in operating conditions. For example, the  
245 Shannon and Simpson indices for the samples fed with complex substrates (i.e., S15, S17, S20,  
246 S27, and S42) were 4.25 and 0.96, respectively, significantly higher than the 2.24 and 0.73 of the  
247 samples fed with non-fermentable substrates. Similar results were reported in previous studies  
248 (Wang et al. 2020a), and a highly diverse microbial community was expected to enhance system  
249 stability (Girvan et al. 2005). In addition, the majority of the samples fed with non-fermentable  
250 and fermentable substrates showed a Chao1 index of approximately 100, indicating that those

251 BESs were sufficiently sampled, and the key microbes could be captured when selecting the core  
252 population. This is confirmed by the rarefaction curves presented in some of the selected  
253 publications.

254  
255 PCoA based on Bray-Curtis distance showed a critical role of substrate composition in microbial  
256 community assembly (Figure 1). Specifically, samples cultivated with starch- and yeast extraction-  
257 based synthetic wastewater (S20 and S22) were found in the top right corner of the PCoA graph,  
258 while those with complex food waste, brewery wastewater, and pig slurry (S15, S17, S42, and S51)  
259 were clustered in the center. S48 used ethanol as the sole carbon source and was isolated from  
260 other samples. Additionally, the anode area appeared to be an important factor that drove the  
261 microbial community assembly in S48 (SI Figure S3), which was amended with granular activated  
262 carbon in the anode. Another key deterministic factor of microbial community assembly is the  
263 seed source. Unlike other studies, S49 was inoculated with activated sludge and formed a distinct  
264 community structure. Similarly, activated sludge was the seed of S35 and together with  
265 temperature (SI Figure S3) led to communities significantly different from other studies. In  
266 summary, varied substrate composition, reactor configuration, and operation mode provided a  
267 comprehensive pool of microbial communities for model construction.

268  
269 Core populations were selected at different taxonomic levels based on the occurrence (at least one  
270 occurrence in the 13 studies with the abundance  $\geq 0.05\%$ ) and abundance ( $\geq 2\%$  across all 77  
271 samples) (Ling et al. 2016, Saunders et al. 2016). At the genus level, 38 core taxa were identified,  
272 accounting for 55% of the abundance on average. The selection criteria were considered stringent  
273 given that the bioreactors were operated under distinct conditions, and the microbial communities

274 were highly diverse. This was reflected by the loss of several abundant taxa in specific BES. For  
275 instance, the core genera made up of less than 20% of the abundance in some of the samples due  
276 to the unique flow pattern (plug-flow, S22), substrate (propyl alcohol, S27), and reactor  
277 configuration (applied voltage, S37). Nonetheless, the core population included some well-  
278 characterized genera such as *Geobacter*, *Desulfovibrio*, *Pseudomonas*, and *Acinetobacter*, which  
279 were frequently found abundant in BES and potentially involved in current production.

280

281 The presence of *Geobacter* often serves as the indicator to explain the BES performance, in  
282 particular current production, because a few members of this genus are highly efficient in  
283 extracellular electron transfer (EET) (Logan et al. 2019, Lovley et al. 2011). Indeed, *Geobacter*  
284 was identified to be a core taxon (G29, Figure 2) with an average abundance of 15% across all  
285 samples and an individual abundance higher than 2% in 39 samples. This genus was dominant in  
286 S20 (17%), S35 (71%), S48 (27%), and some of the samples in S15 (9%) and S49 (8%), which all  
287 showed a CE over 15%. However, *Geobacter* was not present in other high-CE samples likely  
288 because the operating conditions (e.g., high salinity in S12 and S54) did not favor its growth  
289 (Miyahara et al. 2015). *Desulfovibrio* spp. from the same class of Deltaproteobacteria are common  
290 sulfate-reducing bacteria whose EET ability has also been reported (Aulenta et al. 2012, Gacitúa  
291 et al. 2014, Yu et al. 2011). This genus (G28, Figure 2) was abundant in 13 samples (>2%) and  
292 dominant in ethanol-fed S48 (27%). *Desulfovibrio* is known to oxidize ethanol with sulfate as the  
293 electron acceptor. In the absence of sulfate, *Desulfovibrio* can still grow syntrophically with  
294 methanogens and oxidize the ethanol to acetate through interspecies hydrogen transfer (Hensgens  
295 et al. 1993, Kremer et al. 1988).

296

297 *Pseudomonas*, a well-studied genus forming biofilm in many anaerobic environments , is another  
298 core taxon that has been reported to carry out EET by using phenazines as an electron shuttle  
299 (Rabaey et al. 2004). *Pseudomonas* (G33, Figure 2) was widely present in S12, S15, S22 S35, S49,  
300 and S54. This genus potentially plays a critical role in shaping the microbial community structure  
301 as the phenazines actively produced for quorum sensing can be scavenged for electron shuttling  
302 by other species such as *Acinetobacter*. As shown in Figure 2, *Acinetobacter* (G32) was found in  
303 samples where *Pseudomonas* was abundant and was previously speculated to utilize phenazines  
304 as electron shuttles for EET (Liu et al. 2013, Yuan et al. 2017). Because EET via electron shuttles  
305 is limited by diffusion and the conductivity of the anolyte (Torres et al. 2010), *Pseudomonas* and  
306 its metabolic partners are less ubiquitous than *Geobacter* in BES, and *Pseudomonas*-dominated  
307 communities are more likely to be found in specific environments such as microbial desalination  
308 cells with a high ion concentration (Yuan et al. 2017).

309  
310 Several genera from the class Bacteroidia were found to be abundant (Figure 2). Previous studies  
311 suggested that this group of bacteria could degrade complex organic compounds including proteins,  
312 polysaccharides, and pectins (Dongowski et al. 2000, Grenier et al. 1989). For instance,  
313 *Parabacteroides* (G6 & G11, Figure 2) show an abundance higher than 5% in most of the samples  
314 fed with complex organic. It has also been reported that some members in the class Bacteroidia  
315 degrade biomass and can serve as scavengers of dead cells (Madigan 2014, Reichenbach 1992).  
316 Those taxa might act as degraders of soluble organic matter and provide electroactive microbes  
317 simple substrates (Tan et al. 2012, Zeppilli et al. 2020). In addition to fermentative bacteria,  
318 methanogens were observed with considerable abundance in S48 (Figure 2) and possibly carried



319 out syntrophic electron transfer with ethanol-consuming in the presence of conductive granular  
320 activated carbon (Yuan et al. 2018).

321  
322 Overall, microbial community analysis demonstrated a core BES population composed of primary  
323 fermentative bacteria that convert complex organic matter to simple electron donors, and  
324 electroactive microbes and their competitors (e.g., methanogens) growing on the fermentative  
325 products. The results thus justify the modeling of BES based on those three guilds (Pinto et al.  
326 2011). However, such a model structure is incapable of differentiating the contribution of different  
327 types of electroactive microbes and their EET mechanisms (i.e., direct contact vs. electron  
328 shuttling) due to the experimental challenge to measure the associated biochemical parameters  
329 (e.g., the concentration of phenazines and other electron shuttles). The same pitfall is also found  
330 in mechanistic modeling of activated sludge and anaerobic digestion, in which the core populations  
331 consist of functionally redundant taxa occupying the same ecological niches (Ju and Zhang 2015).  
332 This explains the constant parameter calibration required by mechanistic models. To address the  
333 issue and improve the prediction robustness, a new modeling approach is imperative.

334

### 335 **3.3 Reconstruction of microbial community**

336 Two types of Bayesian networks were trained with the same dataset containing environmental  
337 parameters and relative abundance of the core populations (SI Figure S4-S6): primary networks  
338 whose node directions were not restricted by *a priori* knowledge and directed networks in which  
339 the operating parameters were set as the parent nodes. The latter were constructed based on the  
340 fact that operating parameters such as external resistance and hydraulic retention time remained

341 unchanged throughout the operation and hence should be not affected by microbial community  
342 dynamics and system performance.

343  
344 To validate the modeling approach and evaluate the prediction of the community structure, Bray-  
345 Curtis similarity between the predicted and observed communities was calculated. At the genus  
346 level, the directed network achieved the most accurate prediction, followed by the primary network  
347 and a null model (Bray-Curtis similarity:  $0.72 > 0.64 > 0.52$ ,  $p < 0.05$ , SI Figure S7A). Similar  
348 trends were observed at the order and phylum levels, but the prediction accuracy did not show  
349 consistent improvement as the taxonomic level increased. The Bray-Curtis similarity from the  
350 directed networks dropped slightly to 0.61 at the order level and raised back to 0.79 at the phylum  
351 level. The results were not in agreement with the previous findings that prediction accuracy could  
352 be continuously improved by training data-driven models at higher taxonomic levels (Kuang et al.  
353 2016, Yuan et al. 2017). It should be noted that those models were built based on highly specific  
354 environments and communities (e.g., acid mine drainage and microbial desalination cells),  
355 whereas the models in the present study considered a variety of environmental conditions, which  
356 might statistically compromise the model robustness (Walpole et al. 2017).

357  
358 To further validate the modeling approach, relative RMSE was calculated for the 6 environmental  
359 parameters and 38 core genera (SI Figure S8-S10). At the genus level, the RMSE values from the  
360 directed and primary network were 2% - 17% and 3% - 24%, respectively. The abundances of  
361 putative electroactive taxa *Desulfovibrio*, *Pseudomonas*, and *Acinetobacter* were well estimated  
362 by both networks with the RMSE ranging from 4% to 10%. On the other hand, the RMSE for  
363 *Geobacter* was improved from 24% with the primary network to 16% with the directed network.

364 The poor prediction of *Geobacter* is likely because some members from this genus, despite their  
365 dominance in many anaerobic environments (Lee et al. 2016, Lin et al. 2017), are inefficient in or  
366 incapable of EET (Lovley et al. 2011, Rotaru et al. 2015). Similar to Bray-Curtis similarity, RMSE  
367 was improved at the phylum but not at the order level (SI Figure S9 and S10). The phylum  
368 Proteobacteria, which includes the putative electroactive taxa discussed above, is estimated with  
369 the highest accuracy (relative RMSE <1%). Overall, the more accurate prediction from the directed  
370 networks at all three taxonomic levels suggests that the modeling approach can be enhanced by  
371 introducing reasonable structure control.

372  
373 After the modeling approach was validated with Bray-Curtis similarity and RMSE, final networks  
374 were constructed from the whole dataset to infer microbial interactions (SI Figure S4-S6). In the  
375 genus-level networks, putative electroactive taxa *Geobacter* (G29), *Desulfovibrio* (G28), and  
376 *Pseudomonas* (G33) did not show any association with CE and current, whilst *Acinetobacter* (G32)  
377 was not correlated with the system output. The networks at higher taxonomic levels yielded even  
378 less interpretable inference regarding the potential functions of the core taxa. For example,  
379 methanogens were predicted to be more related to current production than Proteobacteria (SI  
380 Figure S6A). The results collectively indicate that more *a priori* knowledge needs to be included  
381 in model training to improve the robustness and interpretability of the inference.

382

### 383 **3.4 Hybrid modeling of BES performance**

384 To build a hybrid model, the rates for substrate utilization and microbial growth and mediator yield  
385 were first estimated using the three-population mechanistic component (SI Table S4). Some of the  
386 estimates were constant during calibration (e.g., 15 /d for substrate utilization rate) because they

387 were the boundary values determined based on previous studies (Bruce and Perry 2001, Kato  
388 Marcus et al. 2007, Wilson and Kim 2016). The estimated microbial kinetic parameters were  
389 subsequently included in the training dataset to construct a hybrid network at the genus level  
390 (Figure 3). It should be noted that the scaled kinetic parameters represent the trend of microbial  
391 activity and thus do not require accurate estimation or validation. A whitelist function was further  
392 applied to force putative electroactive genera *Geobacter*, *Desulfovibrio*, *Pseudomonas*, and  
393 *Acinetobacter* to directly affect current generation and improve the prediction interpretability.  
394 The hybrid network yielded a simulated community that shared a Bray-Curtis similarity of 0.72  
395 with the actual genera-level core population, which was comparable to the result from the directed  
396 network and significantly better than that of the null model (t-test,  $p < 0.05$ ). The relative RMSE  
397 of the hybrid model ranging from 3% to 18% was also similar to those from the directed network.  
398  
399 The hybrid network generated reasonable inference of the relationships between microbial  
400 population and kinetics (Figure 3), as evidenced by the strong positive correlation of the EET-  
401 related substrate utilization rate with *Desulfovibrio* (coefficient = 0.86), as well as the positive  
402 correlation of mediator yield with *Pseudomonas*. Meanwhile, mediator yield was negatively  
403 related to glucose, likely because fermentable substrates could lead to significant electron loss  
404 (Parameswaran et al. 2010). The EET-related substrate utilization and growth rates were both  
405 associated with the genera (G6 & G8) from the class Bacteroidia. As discussed above, those taxa  
406 can degrade dead cells and soluble microbial products, thereby creating a favorable environment  
407 for electroactive microbes (Ni et al. 2011, Ni et al. 2010). Despite those biologically sound  
408 inferences, the hybrid model still contained unexplainable interactions such as the negative

409 association between the EET-related substrate utilization rate and anode area, underpinning the  
410 elimination of data-driven models in prediction interpretability.

411  
412 The developed models were examined with six new samples that were not included in network  
413 training, and the hybrid model (hybrid network + mechanistic component) achieved the most  
414 accurate prediction of current production compared with the data-driven models. It can be seen  
415 from Figure 4 that the predicted results from the hybrid model agree well with the experimental  
416 values with slight deviation at the high current range. The low relative error-based RMSE of 0.8  
417 further indicates outstanding prediction accuracy throughout the examined current range. The  
418 hybrid network alone loses the prediction power at high current, resulting in a higher relative error-  
419 based RMSE of 6.7, whereas the directed network is incapable of generating satisfactory prediction  
420 and shows the highest relative error-based RMSE of 16.3. The significantly improved prediction  
421 performance of the hybrid model likely stems from the close connection between population  
422 dynamics and microbial kinetics. Under a given condition, each population (either a single species  
423 or a functional guild) has specific maximum substrate utilization and growth rates that are largely  
424 determined by its unique lifestyle and ecophysiology (Rittmann and McCarty 2012), which can  
425 thus be statistically inferred from the genomic data (Weissman et al. 2021). On the other hand,  
426 system performance such as current production is affected by not only microbial population and  
427 activity, but also many other operating parameters including electrolyte conductivity and external  
428 resistance. Data-driven models that infer system performance directly from the microbial  
429 population do not consider the contribution of those operating parameters and hence cannot  
430 consistently yield accurate predictions.

431

432 Despite the robust performance, the hybrid model is not ready for practical implementation as  
433 accurate prediction can only be obtained with microbial community information as the input.  
434 When the data-driven component is fed solely with operating parameters, and the simulated  
435 microbial community serves as the intermediate to estimate the kinetic parameters, the prediction  
436 error quickly builds up along the inference, causing considerable uncertainty to the final prediction.  
437 Another challenge is that inadequate biochemical and sequencing data from the selected  
438 publications compromise the compatibility of both the data-driven and mechanistic components.  
439 These issues will be addressed in future studies with proper experimental design and alternative  
440 machine learning algorithms such as neural networks and random forest. Ultimately, the hybrid  
441 modeling approach is expected to be broadly applicable to various engineered bioprocesses  
442 including anaerobic digesters, activated sludge processes, anaerobic ammonium oxidation, etc.

443

#### 444 **4. Conclusion**

445 We collected 77 samples from 13 studies in which the BES were operated under diverse conditions.  
446 Community analysis revealed a core population composed of primary fermentative bacteria,  
447 putative electroactive taxa *Geobacter*, *Desulfovibrio*, *Pseudomonas*, and *Acinetobacter*, as well as  
448 non-electroactive microbes such as methanogens. Bayesian networks were trained with the core  
449 populations and validated with Bray-Curtis similarity, relative RMSE, and a null model, all based  
450 on a leave-one-out cross-validation strategy. A hybrid model was built by combining mechanistic  
451 modeling and network training and achieved more accurate prediction of current production than  
452 data-driven models. This study provides insights into incorporating genomic data into hybrid  
453 modeling for robust and interpretable prediction.

454

455 **Acknowledgement**

456 This work was supported by the U.S. Department of Agriculture [Award No. 2020-67019-31027].

457 **Reference**

- 458
- 459 Aulenta, F., Catapano, L., Snip, L., Villano, M. and Majone, M. (2012) Linking Bacterial  
460 Metabolism to Graphite Cathodes: Electrochemical Insights into the H<sub>2</sub>-Producing Capability of  
461 *Desulfovibrio* sp. *ChemSusChem* 5(6), 1080-1085.
- 462 Batstone, D.J., Keller, J., Angelidaki, I., Kalyuzhnyi, S., Pavlostathis, S., Rozzi, A., Sanders, W.,  
463 Siegrist, H. and Vavilin, V. (2002) The IWA anaerobic digestion model no 1 (ADM1). *Water*  
464 *Science and Technology* 45(10), 65-73.
- 465 Bernard, O., Chachuat, B., Hélias, A. and Rodriguez, J. (2006) Can we assess the model  
466 complexity for a bioprocess: theory and example of the anaerobic digestion process. *Water*  
467 *Science and Technology* 53(1), 85-92.
- 468 Bhat, N. and McAvoy, T.J. (1990) Use of neural nets for dynamic modeling and control of  
469 chemical process systems. *Computers & Chemical Engineering* 14(4-5), 573-582.
- 470 Bishop, C.M. (2013) *Neural networks for pattern recognition*, Oxford University Press, Oxford.
- 471 Bro, R., Kjeldahl, K., Smilde, A.K. and Kiers, H.A. (2008) Cross-validation of component  
472 models: a critical look at current methods. *Anal Bioanal Chem* 390(5), 1241-1251.
- 473 Bruce, E.R. and Perry, L.M. (2001) *Environmental Biotechnology: Principles and Applications*,  
474 McGraw-Hill Education, New York.
- 475 Callahan, B.J., McMurdie, P.J., Rosen, M.J., Han, A.W., Johnson, A.J.A. and Holmes, S.P.  
476 (2016) DADA2: High-resolution sample inference from Illumina amplicon data. *Nature Methods*  
477 13(7), 581-583.
- 478 Cote, M., Grandjean, B.P., Lessard, P. and Thibault, J. (1995) Dynamic modelling of the  
479 activated sludge process: improving prediction using neural networks. *Water research* 29(4),  
480 995-1004.
- 481 De Clercq, D., Jalota, D., Shang, R., Ni, K., Zhang, Z., Khan, A., Wen, Z., Caicedo, L. and  
482 Yuan, K. (2019) Machine learning powered software for accurate prediction of biogas  
483 production: A case study on industrial-scale Chinese production data. *Journal of Cleaner*  
484 *Production* 218, 390-399.
- 485 DeSantis, T.Z., Hugenholtz, P., Larsen, N., Rojas, M., Brodie, E.L., Keller, K., Huber, T.,  
486 Dalevi, D., Hu, P. and Andersen, G.L. (2006) Greengenes, a Chimera-Checked 16S rRNA Gene  
487 Database and Workbench Compatible with ARB. *Applied and Environmental Microbiology*  
488 72(7), 5069.
- 489 Dongowski, G., Lorenz, A. and Anger, H. (2000) Degradation of Pectins with Different Degrees  
490 of Esterification by *Bacteroides thetaiotaomicron*; Isolated from Human  
491 Gut Flora. *Applied and Environmental Microbiology* 66(4), 1321.



- 492 Donoso-Bravo, A., Mailier, J., Martin, C., Rodríguez, J., Aceves-Lara, C.A. and Wouwer, A.V.  
493 (2011) Model selection, identification and validation in anaerobic digestion: a review. *Water*  
494 *research* 45(17), 5347-5364.
- 495 Gacitúa, M.A., González, B., Majone, M. and Aulenta, F. (2014) Boosting the electrocatalytic  
496 activity of *Desulfovibrio paquesii* biocathodes with magnetite nanoparticles. *International*  
497 *Journal of Hydrogen Energy* 39(27), 14540-14545.
- 498 Girvan, M.S., Campbell, C.D., Killham, K., Prosser, J.I. and Glover, L.A. (2005) Bacterial  
499 diversity promotes community stability and functional resilience after perturbation.  
500 *Environmental Microbiology* 7(3), 301-313.
- 501 Gotelli, N.J., & Graves, G. R. (2002 ) Null models in ecology, Smithsonian Institution  
502 Press, Washington.
- 503 Grenier, D., Mayrand, D. and McBride, B.C. (1989) Further studies on the degradation of  
504 immunoglobulins by black-pigmented *Bacteroides*. *Oral Microbiology and Immunology* 4(1),  
505 12-18.
- 506 Hensgens, C.M., Vonck, J., Van Beeumen, J., van Bruggen, E.F. and Hansen, T.A. (1993)  
507 Purification and characterization of an oxygen-labile, NAD-dependent alcohol dehydrogenase  
508 from *Desulfovibrio gigas*. *Journal of Bacteriology* 175(10), 2859.
- 509 Henze, M., Gujer, W., Mino, T. and van Loosdrecht, M.C. (2000) Activated sludge models  
510 ASM1, ASM2, ASM2d and ASM3, IWA publishing.
- 511 Jeppsson, U. (1996) Modelling aspects of wastewater treatment processes.
- 512 Ju, F. and Zhang, T. (2015) Bacterial assembly and temporal dynamics in activated sludge of a  
513 full-scale municipal wastewater treatment plant. *The ISME Journal* 9(3), 683-695.
- 514 Kahn, S.D. (2011) On the future of genomic data. *Science* 331(6018), 728-729.
- 515 Karama, A., Bernard, O., Gouzé, J., Benhammou, A. and Dochain, D. (2001) Hybrid neural  
516 modelling of an anaerobic digester with respect to biological constraints. *Water Science and*  
517 *Technology* 43(7), 1-8.
- 518 Kato Marcus, A., Torres, C.I. and Rittmann, B.E. (2007) Conduction-based modeling of the  
519 biofilm anode of a microbial fuel cell. *Biotechnology and Bioengineering* 98(6), 1171-1182.
- 520 Kremer, D.R., Nienhuis-Kuiper, H.E. and Hansen, T.A. (1988) Ethanol dissimilation in  
521 *Desulfovibrio*. *Archives of Microbiology* 150(6), 552-557.
- 522 Kuang, J., Huang, L., He, Z., Chen, L., Hua, Z., Jia, P., Li, S., Liu, J., Li, J., Zhou, J. and Shu, W.  
523 (2016) Predicting taxonomic and functional structure of microbial communities in acid mine  
524 drainage. *The ISME Journal* 10(6), 1527-1539.

- 525 Larsen, P.E., Field, D. and Gilbert, J.A. (2012) Predicting bacterial community assemblages  
526 using an artificial neural network approach. *Nature Methods* 9(6), 621-625.
- 527 Lee, D.S., Jeon, C.O., Park, J.M. and Chang, K.S. (2002) Hybrid neural network modeling of a  
528 full-scale industrial wastewater treatment process. *Biotechnology and Bioengineering* 78(6),  
529 670-682.
- 530 Lee, H.-S., Torres, C.I. and Rittmann, B.E. (2009) Effects of Substrate Diffusion and Anode  
531 Potential on Kinetic Parameters for Anode-Respiring Bacteria. *Environmental Science &  
532 Technology* 43(19), 7571-7577.
- 533 Lee, J.-Y., Lee, S.-H. and Park, H.-D. (2016) Enrichment of specific electro-active  
534 microorganisms and enhancement of methane production by adding granular activated carbon in  
535 anaerobic reactors. *Bioresource Technology* 205, 205-212.
- 536 Lesnik, K.L., Cai, W. and Liu, H. (2020) Microbial Community Predicts Functional Stability of  
537 Microbial Fuel Cells. *Environmental Science & Technology* 54(1), 427-436.
- 538 Lesnik, K.L. and Liu, H. (2017) Predicting Microbial Fuel Cell Biofilm Communities and  
539 Bioreactor Performance using Artificial Neural Networks. *Environmental Science & Technology*  
540 51(18), 10881-10892.
- 541 Lin, R., Cheng, J., Zhang, J., Zhou, J., Cen, K. and Murphy, J.D. (2017) Boosting biomethane  
542 yield and production rate with graphene: The potential of direct interspecies electron transfer in  
543 anaerobic digestion. *Bioresource Technology* 239, 345-352.
- 544 Ling, F., Hwang, C., LeChevallier, M.W., Andersen, G.L. and Liu, W.-T. (2016) Core-satellite  
545 populations and seasonality of water meter biofilms in a metropolitan drinking water distribution  
546 system. *The ISME Journal* 10(3), 582-595.
- 547 Liu, H., Ishikawa, M., Matsuda, S., Kimoto, Y., Hori, K., Hashimoto, K. and Nakanishi, S.  
548 (2013) Extracellular Electron Transfer of a Highly Adhesive and Metabolically Versatile  
549 Bacterium. *ChemPhysChem* 14(11), 2407-2412.
- 550 Liu, Y., Zhang, Y., Zhao, Z., Ngo, H.H., Guo, W., Zhou, J., Peng, L. and Ni, B.-J. (2017) A  
551 modeling approach to direct interspecies electron transfer process in anaerobic transformation of  
552 ethanol to methane. *Environmental Science and Pollution Research* 24(1), 855-863.
- 553 Logan, B., Cheng, S., Watson, V. and Estadt, G. (2007) Graphite Fiber Brush Anodes for  
554 Increased Power Production in Air-Cathode Microbial Fuel Cells. *Environmental Science &  
555 Technology* 41(9), 3341-3346.
- 556 Logan, B.E., Hamelers, B., Rozendal, R., Schröder, U., Keller, J., Freguia, S., Aelterman, P.,  
557 Verstraete, W. and Rabaey, K. (2006) Microbial fuel cells: methodology and technology.  
558 *Environmental Science & Technology* 40(17), 5181-5192.
- 559 Logan, B.E., Rossi, R., Ragab, A.a. and Saikaly, P.E. (2019) Electroactive microorganisms in  
560 bioelectrochemical systems. *Nature Reviews Microbiology* 17(5), 307-319.

- 561 Lovley, D.R., Ueki, T., Zhang, T., Malvankar, N.S., Shrestha, P.M., Flanagan, K.A., Aklujkar,  
562 M., Butler, J.E., Giloteaux, L., Rotaru, A.-E., Holmes, D.E., Franks, A.E., Orellana, R., Risso, C.  
563 and Nevin, K.P. (2011) *Advances in Microbial Physiology*. Poole, R.K. (ed), pp. 1-100,  
564 Academic Press.
- 565 Ludwig, W., Strunk, O., Westram, R., Richter, L., Meier, H., Yadhukumar, Buchner, A., Lai, T.,  
566 Steppi, S., Jobb, G., Förster, W., Brettske, I., Gerber, S., Ginhart, A.W., Gross, O., Grumann, S.,  
567 Hermann, S., Jost, R., König, A., Liss, T., Lüßmann, R., May, M., Nonhoff, B., Reichel, B.,  
568 Strehlow, R., Stamatakis, A., Stuckmann, N., Vilbig, A., Lenke, M., Ludwig, T., Bode, A. and  
569 Schleifer, K.H. (2004) ARB: a software environment for sequence data. *Nucleic Acids Research*  
570 32(4), 1363-1371.
- 571 Madigan, M., Bender, K., Buckley, D., Sattley, W. and Stahl, D. (2014) *Brock biology of*  
572 *microorganisms* Pearson, Boston.
- 573 Mendes, C., da Silva Magalhes, R., Esquerre, K. and Queiroz, L.M. (2015) Artificial Neural  
574 Network Modeling for Predicting Organic Matter in a Full-Scale Up-Flow Anaerobic Sludge  
575 Blanket (UASB) Reactor. *Environmental Modeling & Assessment* 20(6), 625-635.
- 576 Miyahara, M., Kouzuma, A. and Watanabe, K. (2015) Effects of NaCl concentration on anode  
577 microbes in microbial fuel cells. *AMB Express* 5(1), 34.
- 578 Moral, H., Aksoy, A. and Gokcay, C.F. (2008) Modeling of the activated sludge process by  
579 using artificial neural networks with automated architecture screening. *Computers & Chemical*  
580 *Engineering* 32(10), 2471-2478.
- 581 Ng, A.N.L. and Kim, A.S. (2007) A mini-review of modeling studies on membrane bioreactor  
582 (MBR) treatment for municipal wastewaters. *Desalination* 212(1), 261-281.
- 583 Ni, B.-J., Rittmann, B.E. and Yu, H.-Q. (2011) Soluble microbial products and their implications  
584 in mixed culture biotechnology. *TRENDS in Biotechnology* 29(9), 454-463.
- 585 Ni, B.-J., Zeng, R.J., Fang, F., Xie, W.-M., Sheng, G.-P. and Yu, H.-Q. (2010) Fractionating  
586 soluble microbial products in the activated sludge process. *Water research* 44(7), 2292-2302.
- 587 Parameswaran, P., Zhang, H., Torres, C.I., Rittmann, B.E. and Krajmalnik-Brown, R. (2010)  
588 Microbial community structure in a biofilm anode fed with a fermentable substrate: The  
589 significance of hydrogen scavengers. *Biotechnology and Bioengineering* 105(1), 69-78.
- 590 Ping, Q., Zhang, C., Chen, X., Zhang, B., Huang, Z. and He, Z. (2014) Mathematical Model of  
591 Dynamic Behavior of Microbial Desalination Cells for Simultaneous Wastewater Treatment and  
592 Water Desalination. *Environmental Science & Technology* 48(21), 13010-13019.
- 593 Pinto, R.P., Srinivasan, B., Escapa, A. and Tartakovsky, B. (2011) Multi-Population Model of a  
594 Microbial Electrolysis Cell. *Environmental Science & Technology* 45(11), 5039-5046.
- 595 Pinto, R.P., Srinivasan, B., Manuel, M.F. and Tartakovsky, B. (2010) A two-population bio-  
596 electrochemical model of a microbial fuel cell. *Bioresource Technology* 101(14), 5256-5265.

- 597 Quast, C., Pruesse, E., Yilmaz, P., Gerken, J., Schweer, T., Yarza, P., Peplies, J. and Glöckner,  
598 F.O. (2013) The SILVA ribosomal RNA gene database project: improved data processing and  
599 web-based tools. *Nucleic Acids Research* 41(D1), D590-D596.
- 600 Rabaey, K., Boon, N., Siciliano, S.D., Verhaege, M. and Verstraete, W. (2004) Biofuel Cells  
601 Select for Microbial Consortia That Self-Mediate Electron Transfer. *Applied and Environmental*  
602 *Microbiology* 70(9), 5373.
- 603 Reichenbach, H. (1992) *The Prokaryotes: A Handbook on the Biology of Bacteria:*  
604 *Ecophysiology, Isolation, Identification, Applications.* Balows, A., Trüper, H.G., Dworkin, M.,  
605 Harder, W. and Schleifer, K.-H. (eds), pp. 3631-3675, Springer New York, New York, NY.
- 606 Rittmann, B.E. and McCarty, P.L. (2012) *Environmental biotechnology: principles and*  
607 *applications*, Tata McGraw-Hill Education.
- 608 Rodríguez, J., Roca, E., Lema, J.M. and Bernard, O. (2008) Determination of the adequate  
609 minimum model complexity required in anaerobic bioprocesses using experimental data. *Journal*  
610 *of Chemical Technology & Biotechnology: International Research in Process, Environmental &*  
611 *Clean Technology* 83(12), 1694-1702.
- 612 Rognes, T., Flouri, T., Nichols, B., Quince, C. and Mahé, F. (2016) VSEARCH: a versatile open  
613 source tool for metagenomics. *PeerJ* 4, e2584.
- 614 Rotaru, A.-E., Woodard, T.L., Nevin, K.P. and Lovley, D.R. (2015) Link between capacity for  
615 current production and syntrophic growth in *Geobacter* species. *Frontiers in Microbiology*  
616 6(744).
- 617 Rudin, C. (2019) Stop explaining black box machine learning models for high stakes decisions  
618 and use interpretable models instead. *Nature Machine Intelligence* 1(5), 206-215.
- 619 Saunders, A.M., Albertsen, M., Vollertsen, J. and Nielsen, P.H. (2016) The activated sludge  
620 ecosystem contains a core community of abundant organisms. *The ISME Journal* 10(1), 11-20.
- 621 Scutari, M. (2010) Learning Bayesian Networks with the bnlearn R Package. *Journal of*  
622 *Statistical Software*. *Journal of Statistical Software* 35(3), 1-22.
- 623 Tan, H.-Q., Li, T.-T., Zhu, C., Zhang, X.-Q., Wu, M. and Zhu, X.-F. (2012) *Parabacteroides*  
624 *chartae* sp. nov., an obligately anaerobic species from wastewater of a paper mill. *International*  
625 *Journal of Systematic and Evolutionary Microbiology* 62(Pt\_11), 2613-2617.
- 626 Torres, C.I., Marcus, A.K., Lee, H.-S., Parameswaran, P., Krajmalnik-Brown, R. and Rittmann,  
627 B.E. (2010) A kinetic perspective on extracellular electron transfer by anode-respiring bacteria.  
628 *FEMS Microbiology Reviews* 34(1), 3-17.
- 629 Torres, C.I., Marcus, A.K., Parameswaran, P. and Rittmann, B.E. (2008) Kinetic Experiments for  
630 Evaluating the Nernst–Monod Model for Anode-Respiring Bacteria (ARB) in a Biofilm Anode.  
631 *Environmental Science & Technology* 42(17), 6593-6597.

- 632 Uusitalo, L. (2007) Advantages and challenges of Bayesian networks in environmental  
633 modelling. *Ecological Modelling* 203(3), 312-318.
- 634 Walpole, R.E., Myers, R.H., Myers, S.L. and Ye, K. (2017) *Probability & statistics for engineers  
635 & scientists*, Pearson Education South Asia Pte, Singapore.
- 636 Wang, B., Liu, W., Zhang, Y. and Wang, A. (2020a) Bioenergy recovery from wastewater  
637 accelerated by solar power: Intermittent electro-driving regulation and capacitive storage in  
638 biomass. *Water Research* 175, 115696.
- 639 Wang, H. and Ren, Z.J. (2013) A comprehensive review of microbial electrochemical systems as  
640 a platform technology. *Biotechnology Advances* 31(8), 1796-1807.
- 641 Wang, L., Long, F., Liao, W. and Liu, H. (2020b) Prediction of anaerobic digestion performance  
642 and identification of critical operational parameters using machine learning algorithms.  
643 *Bioresource Technology* 298, 122495.
- 644 Weissman, J.L., Hou, S. and Fuhrman, J.A. (2021) Estimating maximal microbial growth rates  
645 from cultures, metagenomes, and single cells via codon usage patterns. *Proceedings of the  
646 National Academy of Sciences* 118(12), e2016810118.
- 647 Wilson, E.L. and Kim, Y. (2016) The yield and decay coefficients of exoelectrogenic bacteria in  
648 bioelectrochemical systems. *Water research* 94, 233-239.
- 649 Yates, M.D., Kiely, P.D., Call, D.F., Rismani-Yazdi, H., Bibby, K., Peccia, J., Regan, J.M. and  
650 Logan, B.E. (2012) Convergent development of anodic bacterial communities in microbial fuel  
651 cells. *The ISME Journal* 6(11), 2002-2013.
- 652 Yu, L., Duan, J., Zhao, W., Huang, Y. and Hou, B. (2011) Characteristics of hydrogen evolution  
653 and oxidation catalyzed by *Desulfovibrio caledoniensis* biofilm on pyrolytic graphite electrode.  
654 *Electrochimica Acta* 56(25), 9041-9047.
- 655 Yuan, H.-Y., Ding, L.-J., Zama, E.F., Liu, P.-P., Hozzein, W.N. and Zhu, Y.-G. (2018) Biochar  
656 Modulates Methanogenesis through Electron Syntrophy of Microorganisms with Ethanol as a  
657 Substrate. *Environmental Science & Technology* 52(21), 12198-12207.
- 658 Yuan, H., Abu-Reesh, I.M. and He, Z. (2016) Mathematical Modeling Assisted Investigation of  
659 Forward Osmosis as Pretreatment for Microbial Desalination Cells to Achieve Continuous Water  
660 Desalination and Wastewater Treatment. *Journal of Membrane Science* 502, 116–123.
- 661 Yuan, H., Lu, Y., Abu-Reesh, I. and He, Z. (2015) Bioelectrochemical production of hydrogen  
662 in an innovative pressure-retarded osmosis/microbial electrolysis cell system: experiments  
663 and modeling. *Biotechnology for Biofuels* 8(116), 1-12.
- 664 Yuan, H., Mei, R., Liao, J. and Liu, W.-T. (2019) Nexus of Stochastic and Deterministic  
665 Processes on Microbial Community Assembly in Biological Systems. *Frontiers in Microbiology*  
666 10(1536).

- 667 Yuan, H., Sun, S., Abu-Reesh, I.M., Badgley, B.D. and He, Z. (2017) Unravelling and  
668 Reconstructing the Nexus of Salinity, Electricity, and Microbial Ecology for Bioelectrochemical  
669 Desalination. *Environmental Science & Technology* 51(21), 12672-12682.
- 670 Zendehboudi, S., Rezaei, N. and Lohi, A. (2018) Applications of hybrid models in chemical,  
671 petroleum, and energy systems: A systematic review. *Applied Energy* 228, 2539-2566.
- 672 Zeppilli, M., Chouchane, H., Scardigno, L., Mahjoubi, M., Gacitua, M., Askri, R., Cherif, A. and  
673 Majone, M. (2020) Bioelectrochemical vs hydrogenophilic approach for CO<sub>2</sub> reduction into  
674 methane and acetate. *Chemical Engineering Journal* 396, 125243.
- 675 Zhao, H., Hao, O.J., McAvoy, T.J. and Chang, C.-H. (1997) Modeling nutrient dynamics in  
676 sequencing batch reactor. *Journal of Environmental Engineering* 123(4), 311-319.
- 677 Zhao, X., Li, L., Wu, D., Xiao, T., Ma, Y. and Peng, X. (2019) Modified Anaerobic Digestion  
678 Model No. 1 for modeling methane production from food waste in batch and semi-continuous  
679 anaerobic digestions. *Bioresource Technology* 271, 109-117.
- 680 Zhu, X., Yates, M.D., Hatzell, M.C., Ananda Rao, H., Saikaly, P.E. and Logan, B.E. (2014)  
681 Microbial Community Composition Is Unaffected by Anode Potential. *Environmental Science &*  
682 *Technology* 48(2), 1352-1358.

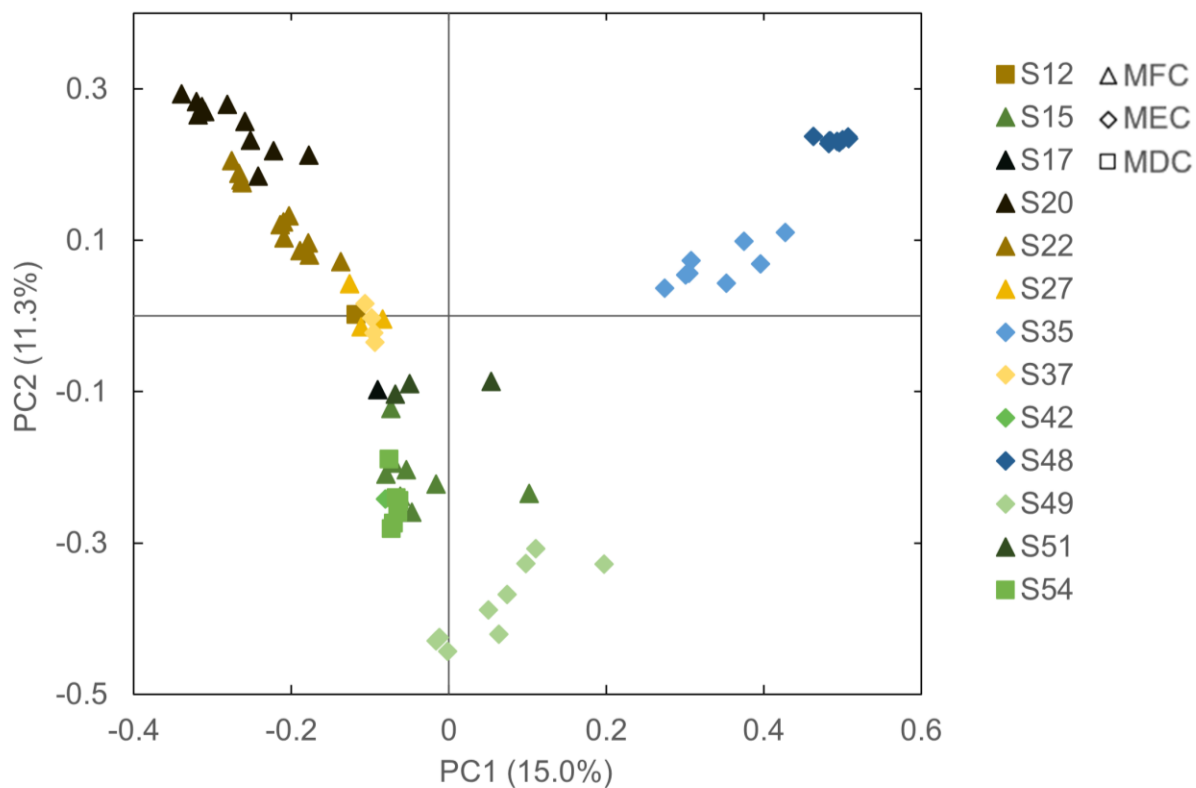

Figure 1. Bray-Curtis distance-based PCoA of the 13 selected studies. MFC: microbial fuel cells, MEC: microbial electrolysis cells, MDC: microbial desalination cells.

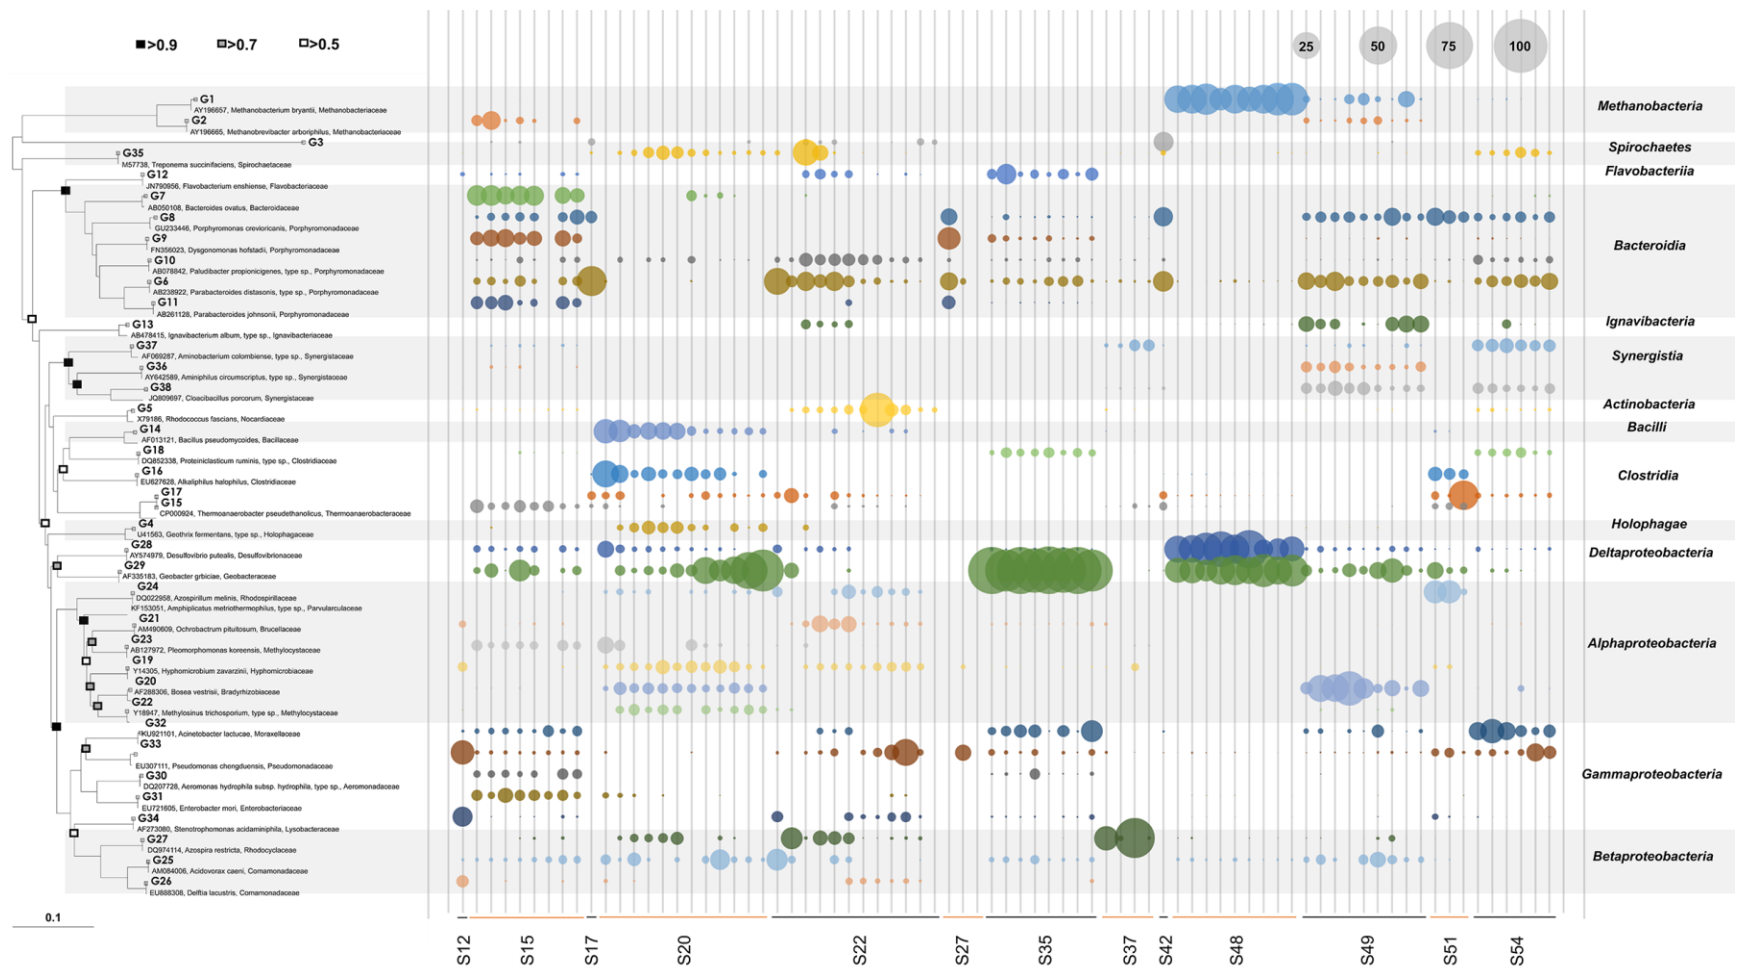

Figure 2. Phylogenetic tree and relative abundance of 38 core genera selected from the 77 samples in 13 publications.



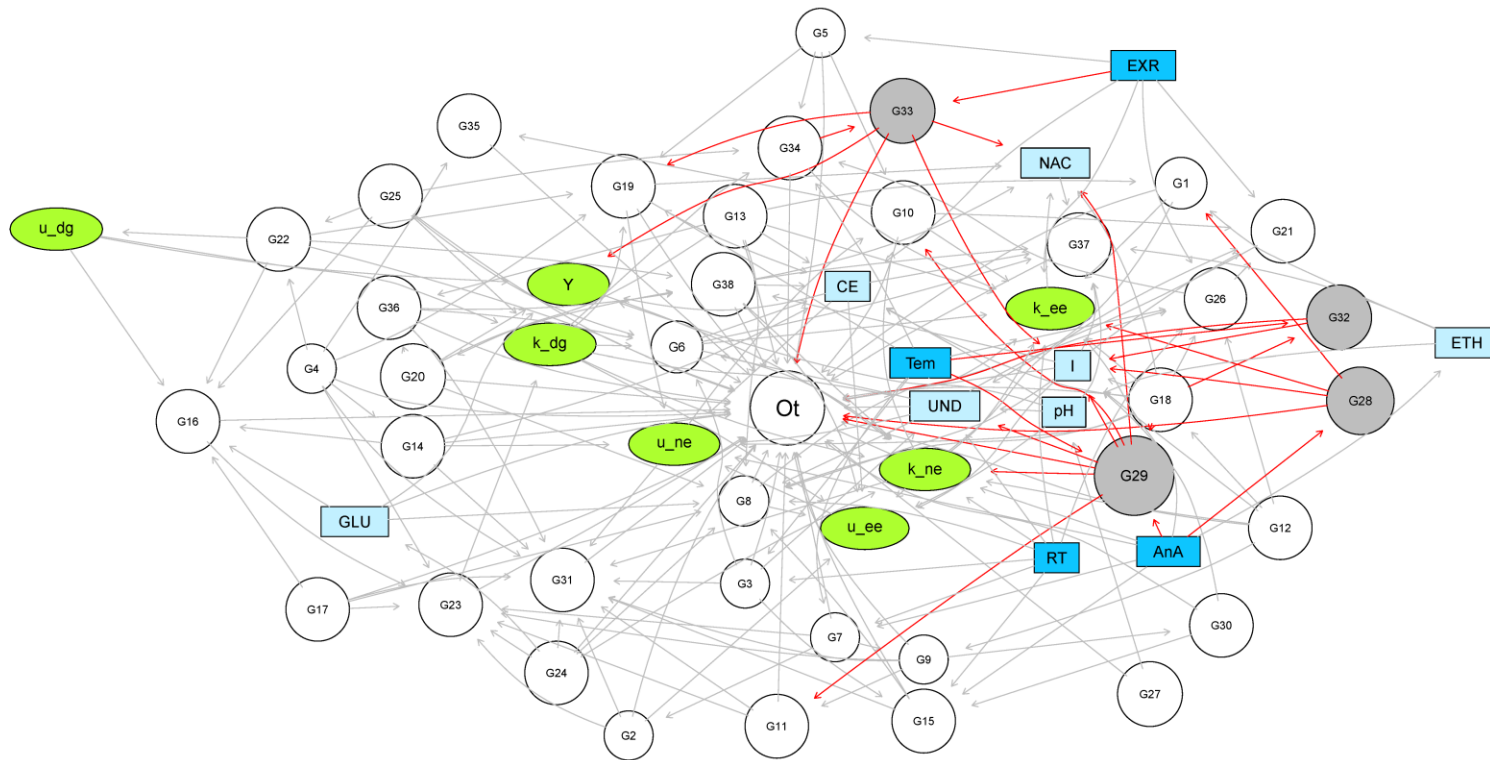

Figure 3. The hybrid Bayesian network at the genus level. *Geobacter* (G29), *Desulfovibrio* (G28), *Pseudomonas* (G33), and *Acinetobacter* (G32) are highlighted in grey and forced to directly affect current. The symbols for the core genera can be found in SI Table S6. Light blue nodes are biochemical parameters. Dark blue nodes are operating parameters unaffected by other nodes and serve only as the parent nodes. Green nodes are kinetic parameters estimated using the mechanistic component, in which  $u_{dg}$ ,  $u_{ee}$ , and  $u_{ne}$  are the maximum growth rates for primary degraders, electroactive microbes, and non-electroactive microbes, respectively.  $k$  is the maximum substrate utilization rate and  $Y$  is the mediator yield. EXR: external resistance, NAC: acetate, CE: coulombic efficiency, I: current, Tem: temperature, ETH: ethanol, GLU: glucose, RT: hydraulic retention time, AnA: anode area, UND: undefined substrate.

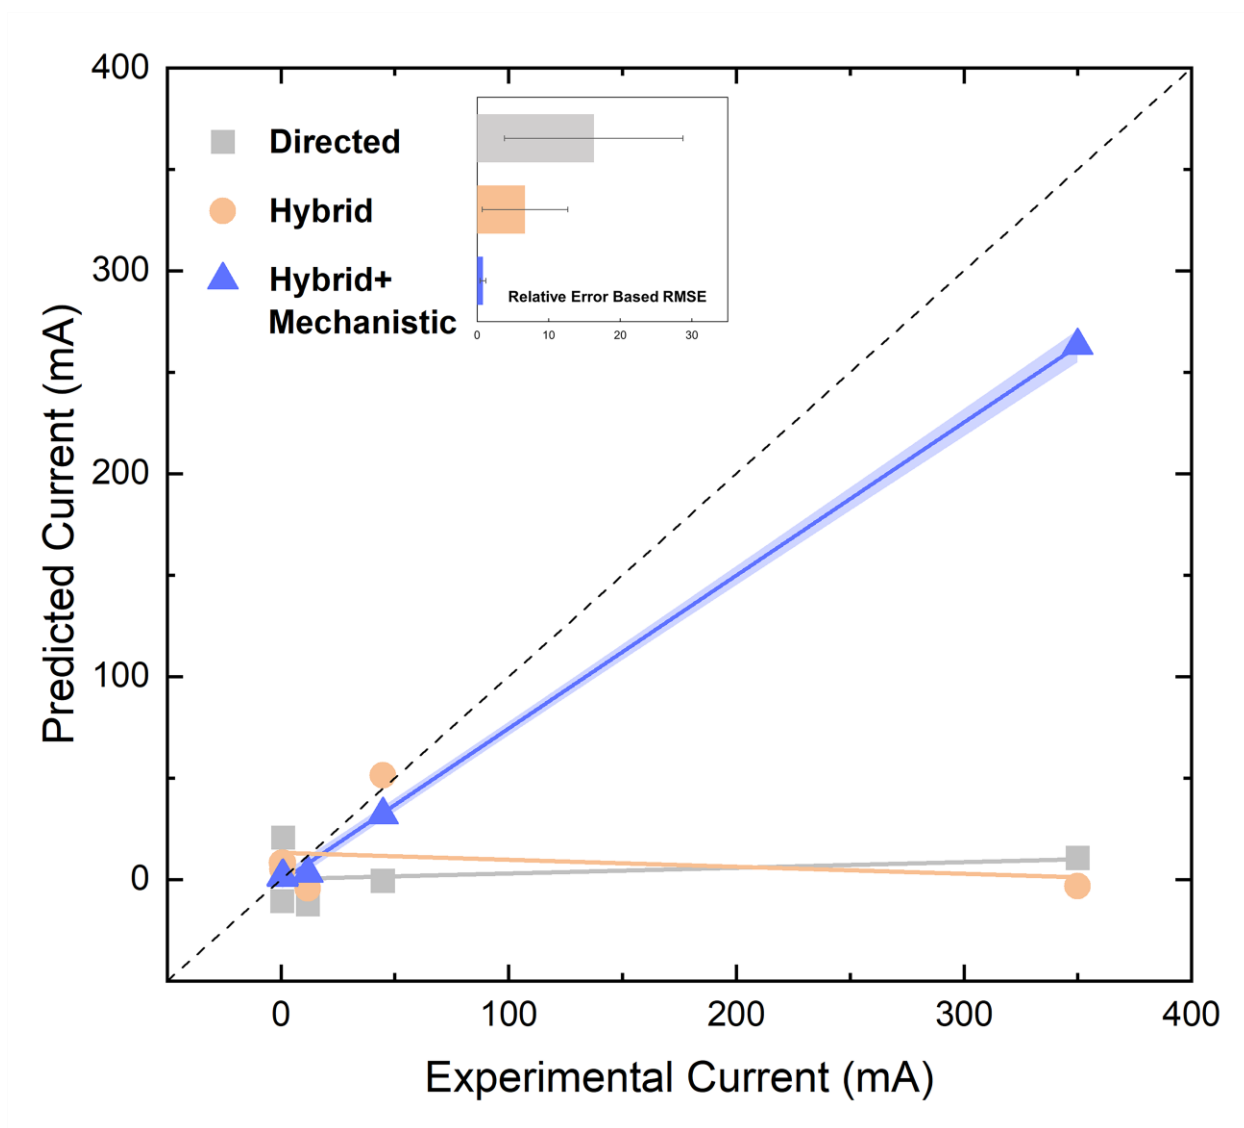

683

Figure 4. Comparison of experimental and predicted current from the directed Bayesian network, hybrid Bayesian network, and hybrid model (hybrid network + mechanistic component). Inset in the relative error-based RMSE.
